# Supplementary material for: Optical Imaging of Tumors with Copper-Labeled Rhodamine Derivatives by Targeting Mitochondria
Source: PubMed Central journal article supplement — Theranostics. 2012 Oct 13;2(10):988–98. doi: 10.7150/thno.4818 (PMC3493204; doi:10.7150/thno.4818), 2012-10-13
Supplement: thnov02p0988s1.pdf [file thnov02p0988s1.pdf]

# SUPPORTING INFORMATION

For the Manuscript Entitled

**“Optical Imaging of Tumors with Copper-Labeled Organic Cations by Targeting Mitochondria”**

by

Xin Yan, Yang Zhou and Shuang Liu\*

School of Health Sciences, Purdue University, West Lafayette, Indiana, USA

RUNNING TITLE: Copper-Labeled Rhodamine Derivatives for Tumor Imaging

---

\*Correspondence should be addressed to:

Dr. Shuang Liu  
School of Health Sciences  
Purdue University  
550 Stadium Mall Drive  
West Lafayette, IN 47907  
Phone: 765-494-0236  
Fax 765-496-1377  
Email: [liu100@purdue.edu](mailto:liu100@purdue.edu)

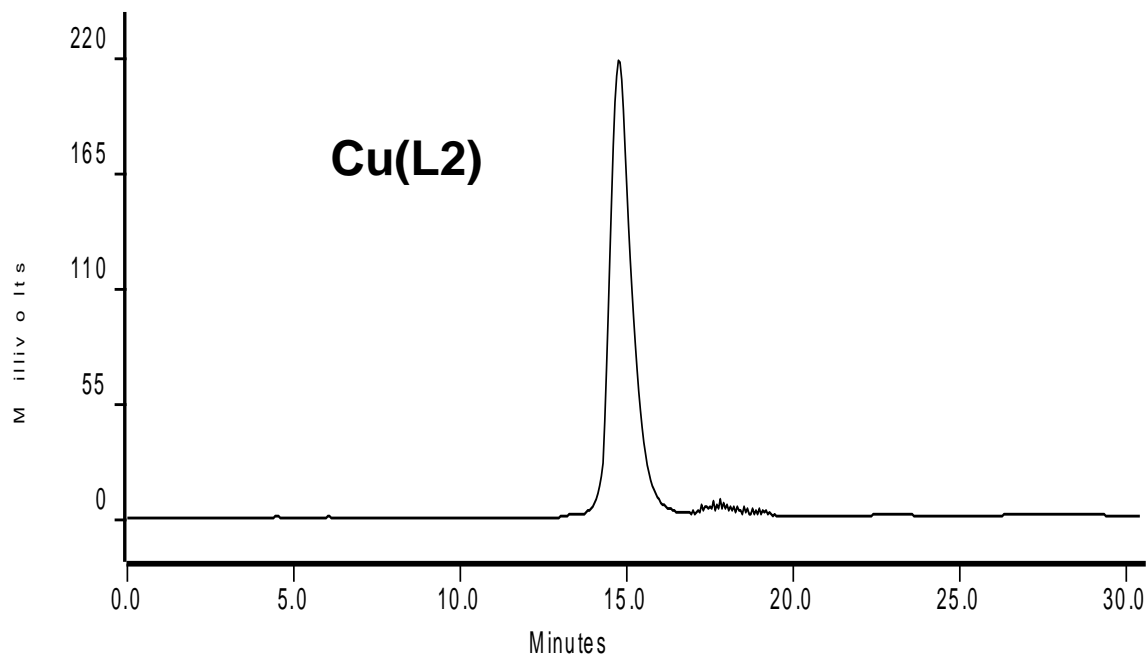

ln-A: yang551.pdf

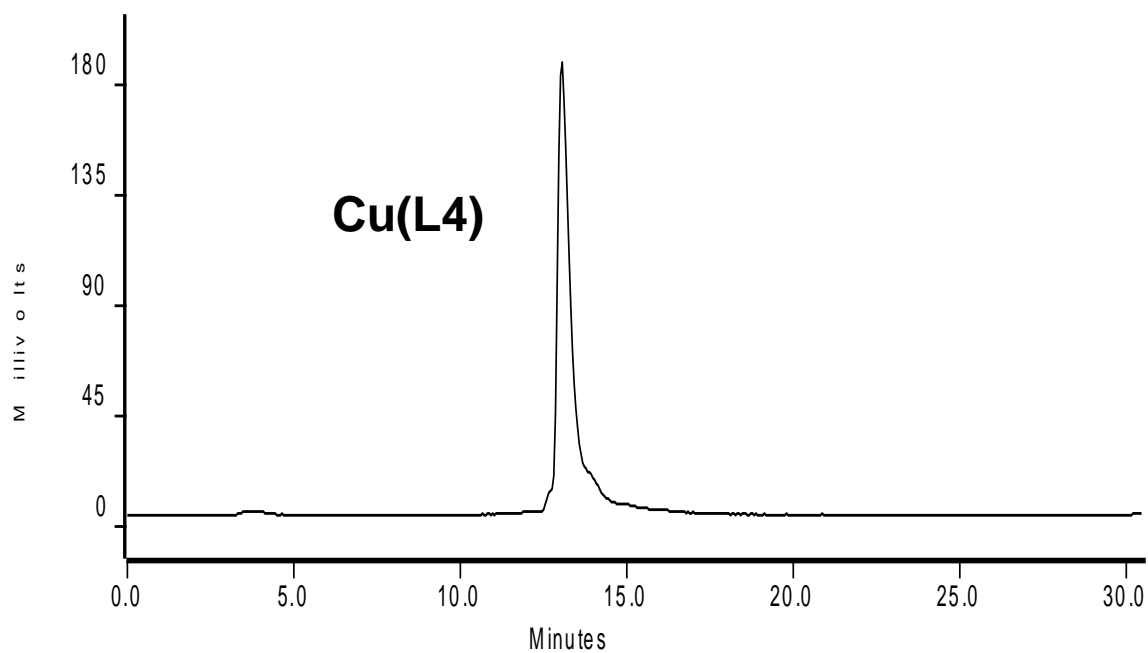

ln-A: tpp711.pdf

Figure S11. Typical HPLC chromatograms for of Cu(L2) and Cu(L4) to demonstrate their HPLC purity.

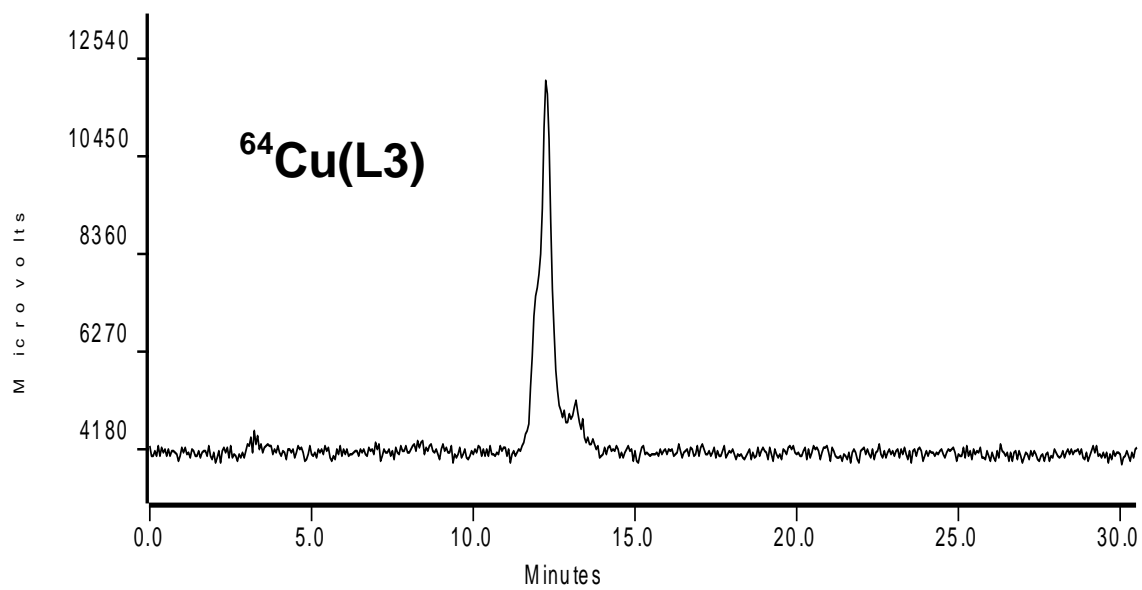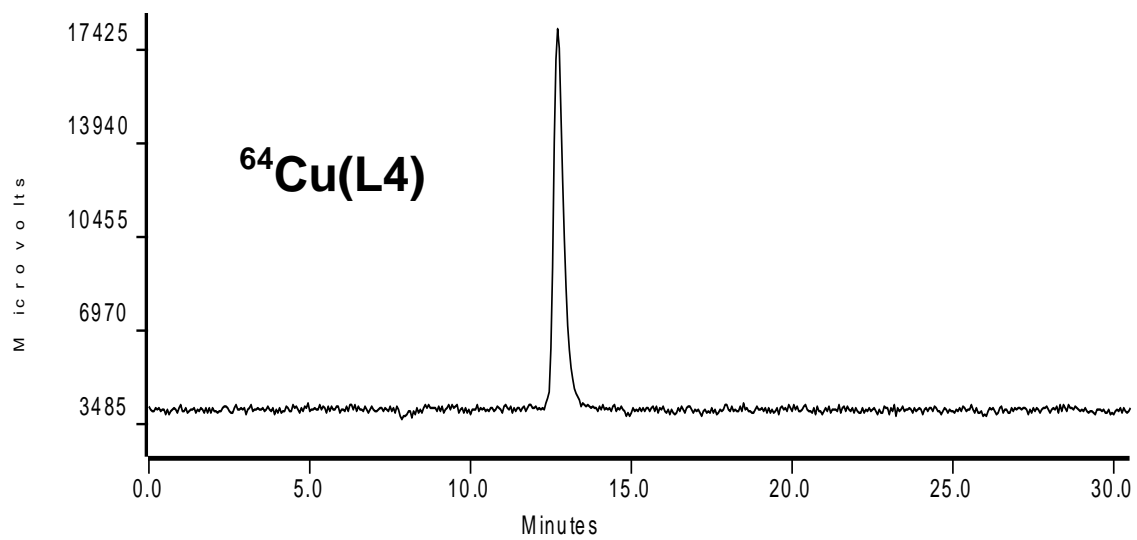

Figure S12. Radio-HPLC chromatograms for  $^{64}\text{Cu(L3)}$  and  $^{64}\text{Cu(L4)}$  to illustrate their radiochemical purity.

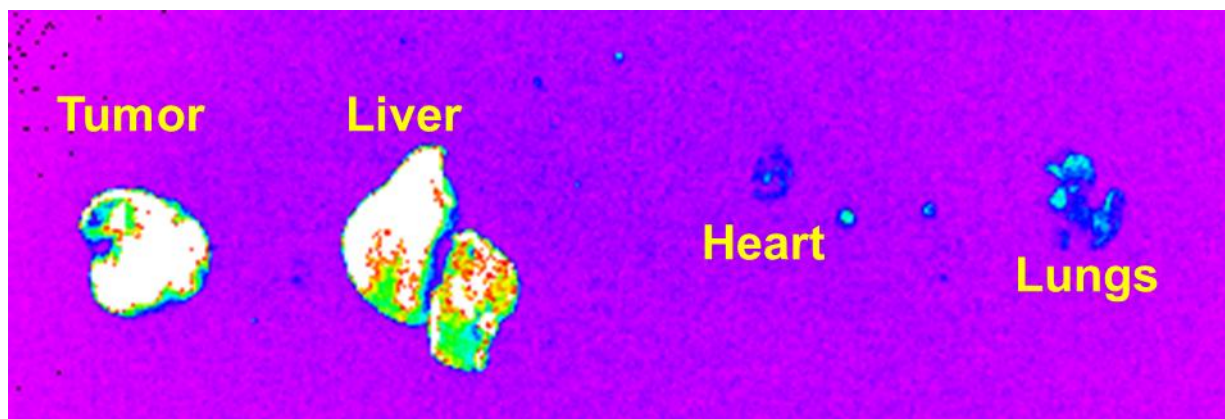

Figure SI3. Optical images of the tumor, liver, heart and lungs extracted from an athymic nude mouse bearing U87MG glioma xenografts (tumor size: 200 mg) 4 h after (left) injection of Cu(L2). The animal was administered with 0.5 mg of Cu(L2) in 100  $\mu$ L PBS via the tail vein injection. No acute toxicity was observed during and after imaging studies. These images were acquired with a Kodak Imaging Station (In-Vivo FX, Eastman Kodak Company) using excitation at 555 nm and emission at 600 nm in combination with CCD camera immediately after removal of organs. Attempts were made to quantify the fluorescent intensity in the extracted organ tissues, but fluorescent intensity always fluctuated depending on the orientation of the organs to be imaged due to significant tissue attenuation of the fluorescent light.
